# Supplementary material for: Transcranial Ultrasound Stimulation Unravels the Causal Role of the Left Inferior Frontal Gyrus in Syntactic Processing
Source: Research Square preprint supplement (doi:10.21203/rs.3.rs-8717654/v1), 2026-01-30
Supplement: Supplementary file 1 [file d573188ece32e3830376662d.docx]

**Unraveling the Causal Role of Left Inferior Frontal Gyrus for Human Syntactic Processing by Transcranial Ultrasound Stimulation**

**Supplementary Information**

**1 The fMRI experiment to localize the key syntactic regions for TUS estimation**

- 1. **Methods**

**1.1.1 Participants**

In order to ensure both LIFG and LpTL are activated during processing the complex sentences in Mandarin Chinese, 90 Chinese native speakers were recruited to perform the sentence processing task. Since the findings of this fMRI study will be reported elsewhere, we briefly introduced the main results here to support the rationale of the TUS experiment in the main text. Given that one participant’s head motion exceeded the criterion (translation: < 2mm; rotation: < 2°), 89 participants’ data were included as valid for subsequent analyses. All participants gave signed informed consent before the experiment and received remuneration for participation. This experiment was approved by the ethics committee of the local university.

**1.1.2 Materials**

Sentence structures are the same as those of the TUS study, whereas the present TUS study modified the sentence materials with geometric shapes to amplify the syntactic effects. Example sentences could be found in Figure S1A, where complex sentences containing the center-embedded relative clauses (24 complex sentences in total) and semantically-matched coordinated sentences (i.e., the simple sentences [24 in total]) were designed. The timing parameters of the stimuli presentation were the same as those of the TUS study. In each trial, participants were required to judge whether the probing sentence correctly reflected the content of the testing sentence.

**1.1.3 Imaging data acquisition**

Participants’ MR imaging data were acquired via a 3.0-Tesla Siemens PRISMA magnetic resonance scanner (Siemens AG, Erlangen, Germany) using a 64-radiofrequency-channel head coil. For functional data acquisition, a T2*-weighted gradient echo planar imaging (EPI) sequence was adopted with the following parameters: repetition time (TR) = 750 ms; echo time (TE) = 30 ms; flip angle (FA) = 60°; field of view (FOV) = 216 × 216 mm2; base resolution = 90 × 90; in-plane resolution = 2.4 × 2.4 mm2; slice thickness = 2.4 mm; number of slices = 60; gap = 0 mm; alignment to AC-PC plane. Signals from different slices were acquired by the multi-band scanning technique (multi-band factor = 6) to efficiently minimize slice-timing effects. The parameters for high-resolution anatomical T1-weighted images for co-registration were listed as following: TR = 2300 ms; TE = 2.07 ms; FA = 7°; FOV = 256 × 256mm2; base resolution = 320 × 280; in-plane resolution = 0.8 × 0.8 mm2; slice thickness = 0.8 mm; number of slices = 240.

**1.1.4 Imaging data analyses**

Imaging data preprocessing mainly followed the basic steps of our previous fMRI study on Chinese jabberwocky sentence processing1 via SPM 12 (https://www.fil.ion.ucl.ac.uk/spm/), including: (a) Removing the first 4 volumes to reduce the magnetic saturation effect; (b) Slice time correction; (c) Field mapping; (d) Spatial realignment; (e) Co-registration; (f) Segmentation (New segment + DARTEL); (g) Nuisance covariates regression (polynomial trend: 1, linear detrending), also including head motion regression by using the Friston-24 model; (h) Normalization of the images to the echo planar imaging (EPI) template based on Montreal Neurological Institute (MNI) stereotactic space to minimize cerebral differences between participants, and resampled the images into 2 × 2 × 2 mm3; (i) Smoothing the images with a 3D Gaussian kernel with full-width at half-maximum (FWHM) of 4 mm.

A general linear model (GLM) was set up for each participant at the first level by adding the complex sentence and the simple sentence conditions as two regressors of interest, with the onset and duration (4 s) of each trial modulated as a boxcar function convolved with a canonical hemodynamic response function (HRF). The data were further high-pass filtered at 128 Hz to eliminate low-frequency drift. The “complex > simple” contrast results for each participant were entered into the second-level analysis. At the second level of group analysis, the one-sample t-test was performed against the null hypothesis that there was no difference between the complex and simple sentence conditions. Given we aimed to localize the peak coordinates of the language regions (esp., LIFG and LpTL) to model the spatial intensity distribution and pressure map of TUS via BabelBrain, a 220 participant-based functional left-hemispheric language atlas extended from Fedorenko et al. (2010) (http://web.mit.edu/evlab//funcloc/) was adopted as the language mask for Small Volume Correction (SVC) (cluster-level *p*FWE < .05, using the cluster defining threshold at *p*uncorrected < .001, KE ≥ 50).

**1.2 Imaging Results**

The imaging results were shown in Figure S2A. A left-hemispheric fronto-temporal network was detected for hierarchical syntactic processing, with peak activations in the LIFG at (-58, 24, 13) and in LpTL at (-51, -44, 3). We therefore used these two peak coordinates for TUS estimation.

**2 The TMS experiment to unravel the trend of the causality of the syntactic regions and to exclude the verbal working memory effect**

**2.1 Methods**

TMS relies on the magnetic-electronic mechanism: The current in the TMS coil generates a perpendicular magnetic field that penetrates the scalp without attenuation to reach the target brain region. This magnetic field, in turn, induces a transient current, which stimulates neurons within the targeted area—ultimately producing either a facilitatory or inhibitory effect, as evidenced by changes in behavioral performance2,3. Before conducting the actual TUS experiment, we initially used TMS to stimulate both LIFG and LpTL to investigate whether there is a significant causal trend for the regions identified in the fMRI experiment reported above. Moreover, it aims to purify the hierarchically structured language effects by excluding linear word order and verbal working memory confounders from the control task of word list processing, which requires participants to judge whether the target word matches the position where it appears in the previous word list. We will briefly introduce this TMS experiment and report the main findings below.

**2.1.1 Participants**

Thirty-six healthy adult Chinese native speakers (Age: 22.8 ± 1.2 years; 17 females) with T1 data from our participant pool, who had undergone the structural magnetic resonance imaging previously for other neuroimaging studies, were recruited. Since 3 participants dropped out, and 3 participants’ sentence processing accuracy rates were below chance level (50%), the data from these 6 participants were discarded, leaving data from the 30 participants for further analyses. All participants gave signed informed consent before the experiment and received remuneration for participation. This experiment was approved by the ethics committee of the local university.

**2.1.2 Materials**

This TMS experiment strictly follows the previous cTBS study on the causal role of the LIFG in syntactic processing4, including 64 complex sentences incorporating 32 SRCs and 32 ORCs, and 64 simple sentences for each session (3 sessions in total: LIFG, LpTL, and vertex TMS). The sentences were composed of names and common verbs, such as “*花花支持喜欢丽丽的老张*” (Huahua supports Laozhang who likes Lili), which are similar to those used in the fMRI experiment. Moreover, 64 word lists, including 50% noun lists and 50 % verb lists, utilizing the same lexicon from the sentence materials, were generated. The word lists incorporating the same word syntactic category were designed to diminish the probability of syntactic combinatorics (see also Zaccarella et al.5) (Figure S1A).

**2.1.3 Procedures**

Participants were required to judge whether the probing sentence correctly expressed the thematic relationships (i.e., “who did what to whom”) contained in the previous testing sentence or to judge whether the probing word matched its position for the word list condition. The response screen lasted for 3s. The timing parameters are the same to those of the TUS experiment. Please refer to Figure S1C for the TMS experimental procedures.

**2.1.4 The TMS with cTBS protocol**

The cTBS protocol is the same as that of Wu et al.4 and Gao et al.6. Participants with high-resolution T1-weighted images scanned via a 3T MRI Scanner (Siemens Prisma) were recruited for navigated TMS. Individual anatomical data were obtained for co-registration with the following imaging parameters: repeated time (TR) = 2530ms; echo time (TE) = 2.98ms; flip angle = 7◦; field-of-view (FOV) = 256 × 256mm2; matrix size = 256 × 256mm2; in-plane resolution within slices = 1.0 × 1.0mm; slice thickness = 1.00 mm; number of slices = 192. Each participant’s T1 image was co-registered with their head in real time using a frameless stereotaxic navigation system (Localite GmbH, Bonn, Germany). The system was recalibrated at the beginning of each TMS session to ensure consistent coil placement across sessions. Specifically, anatomical landmarks, such as the anterior and posterior commissures and the falx cerebri, were utilized to guide the co-registration process. Reflective markers attached to participants' headbands enabled real-time tracking and dynamic adjustments to coil positioning within the predefined target region. These procedures were identical across all three TMS sessions to minimize variability and enhance the reliability of the stimulation process.

To avoid the potential task bias of localization as identified from the fMRI experiment, the coordinates from a previous meta-analysis on hierarchical syntactic processing (esp., *Merge*)5 were extracted for the present TMS experiment: LIFG (-54, 20, 26), LpTL (-62, -48, 6). Vertex (0, 0, 75), as an active control site, was defined as the electrode Cz according to the 10-20 international electrode placement system7. After defining the stimulation sites, TMS was delivered using a MagPro X100 TMS stimulator (MagVenture), which is equipped with a standard 70 mm figure-of-eight coil (MagVenture MCF-B65). The stimulation protocol followed procedures described in our previous research4,6 and also conformed to the established guidelines8. Single pulses were delivered at the beginning of the first TMS session to the left primary motor cortex (M1), targeting the hand area, to determine the resting motor threshold (RMT). We recorded the Motor-evoked potentials (MEPs) from the right first dorsal interosseous muscle by using electromyography9,10. Electrodes were configured in a belly-tendon montage, and the ground electrode was attached to the left wrist. Participants were seated comfortably and were instructed to keep their hands relaxed during the procedure. The TMS coil was positioned tangentially to the scalp at a 45° angle relative to the midline of the central sulcus, with the handle pointing laterally and posteriorly11. RMT was defined as the minimum stimulation intensity required to generate MEPs with a peak-to-peak amplitude of at least 50 μV in five or more out of ten consecutive trials8,12. Participants’ RMT values ranged from 42% to 72%, with a mean of 58.48% ± 6.62%. Stimulation intensity was set to 80% of each participant’s RMT, consistent with prior studies employing theta-burst stimulation protocols11–13. The cTBS was then applied at each site during a given session. The cTBS protocol was configured to deliver triplets of stimulation pulses at 50Hz, repeated every 200ms (= 5 Hz), in a continuous 40-second train, resulting in a total of 600 pulses12,14.

**2.1.5 Data analyses**

The data analyses are the same as the TUS experiment. The lme4 and lmerTest package in R 4.2.2 were employed to contrast linear mixed-effects models (LMMs) for response time (*RT*) of correctly responded sequences, and generalized linear mixed-effects models (GLMMs) were used to analyze accuracy15–18. The full model for *RT* or accuracy was defined as:

*RT or Accuracy ~ Stimulation region × Structure type + (1 + Stimulation region × Structure type | Subject) + (1 + Stimulation region | Item)*.

To note, “*Stimulation region*” contains LIFG, LpTL, and vertex; “*Structure type*” incorporates the complex and the simple sentences. The Restricted Maximum Likelihood (REML) method will be used for parameter estimation. Fixed effects will be tested using a two-tailed t-test with the Kenward-Roger method for degrees of freedom estimation.

Moreover, synthesized indices at the group-level, including *d’*, *RT**, and *CV*, were also analyzed to evaluate the TMS effects in a relatively comprehensive manner via repeated measures analysis of variance (ANOVA)4.

**2.2 Results**

The LMMs showed a significant main effect of Structure type: *F*(2, 34.18) = 53.50, *p* < 0.001. The post-hoc tests showed that complex sentence processing was significantly slower than the simple sentence processing (*b* = 0.013, *SE* = 0.003, *z* = 4.866, *p* < 0.001), which was in turn slower than word list processing (*b* = 0.042, *SE* = 0.005, *z* = 7.999, *p* < 0.001). The Stimulation region did not show a significant main effect (*F* = 0.90, *p* = 0.416) or its interactive effect with the Structure type (*F* = 1.22, *p* = 0.300) for *RT*.

For accuracy, the GLMMs again identified a significant main effect of Structure type: χ2(2) = 13.33, *p* = 0.001. The post-hoc tests revealed that the accuracy of simple sentence processing was significantly higher than that of word list processing (*b* = 0.382, *SE* = 0.105, *z* = 3.650, *p* = 0.001). No significant differences were found between complex and simple sentence processing, nor between complex sentence and word-list processing (|*z|*s ≤ 2.117, *p*s ≥ 0.103). Detailed statistical outputs from the LMMs (for *RT*) and GLMMs (for accuracy) are summarized in Table S1 and S2.

For the group-level behavioral indices, both processing quality indices showed a significant main effect of Structure type (*d’*: *F* (2, 58) = 4.071, *p* = 0.022, *ηp*2 = 0.123; *RT**: *F* (1.46, 42.41) = 17.503, *p* < 0.001, *ηp*2 = 0.376). Post-hoc tests revealed that *d’* did not differ between complex and simple sentence processing, nor between complex sentence and word-list processing (|*t|*s ≤ 1.669, *p*s ≥ 0.301); however, the *d’* for simple sentence processing was significantly greater than that for word-list processing (*t* = 2.839, *p =* 0.019). For *RT**, complex sentence processing showed significantly higher values than both simple sentence and word-list processing, and simple sentence processing was significantly higher than word-list processing (|*t|*s ≥ 2.756, *p*s ≤ 0.023). Nevertheless, as for the processing stability, results of *CV* showed a marginally significant interaction between Stimulation region and Structure type (complex sentences, simple sentences, and word lists) (*F* (4, 116) = 2.018, *p* = 0.097, *ηp*2 = 0.065). Specifically, under the LIFG condition, complex sentence processing TMS led to a marginally significant increase in *CV* (indicating greater instability) compared with word-list processing. Under the LpTL condition, the *CV* for complex sentence processing was marginally significantly larger than that for word-list processing, and the *CV* for simple sentence processing was significantly larger than for word-list processing. Therefore, the *CV* results indicated that LIFG and LpTL might be sensitive to higher syntactic complexity, which should be independent of the word order or verbal working memory effects from word list processing, although the present TMS results could only provide a trend of the causal role of LIFG and LpTL in hierarchical syntactic processes. And this should be further specified by the TUS results. The distributions of behavioral indices (*CV*, *d′*, and *RT**) across sentence structures are illustrated in Figure S2B and C.

**2.3 A brief discussion**

TMS results showed a trend that LIFG and LpTL TMS would deteriorate the sentence processing stability, which was independent of the word order or verbal working memory effects from the control condition of word list processing. Notably, compared with the LpTL, the LIFG more effectively dissociated complex sentence processing from both simple sentence and word-list processing, rather than merely separating sentence processing from word-list processing.

The LIFG TMS results, though there was a marginally significant interaction between the Stimulation region and Structure type, are actually consistent with the previous syntactic TMS studies which propose that LIFG plays a pivotal causal role in syntactic processing19–23. Our recent TMS studies utilizing the cTBS protocol also identified that LIFG TMS would reduce the processing stability, as reflected by the larger *CV*s4. In accordance with the previous meta-analysis on TMS efficacy in healthy people’s language processing performance24, TMS over frontal regions (esp., IFG) could not yield robust perturbations in *RT* or accuracy (esp., for syntactic tasks). Nevertheless, the group-level processing stability index (*CV*) serves as a useful behavioral marker that consistently signals the causal role of LIFG in hierarchical syntactic operations4,6. Jeon and Friederici25 proposed the degree of automaticity principle of organization of the prefrontal cortex, as evidenced by the correlation between higher activation of the left BA 44 within LIFG during syntactic processing and lower CVs, which also reflect higher processing automaticity. The stimulation coordinates of LIFG in Experiment 1 of this study were derived from Zaccarella et al.’s meta-analysis5, which reside exactly in BA 44. In light of the degree of automaticity principle, cTBS might inhibit the activation of BA 44 and thus diminish the processing automaticity, making hierarchical syntactic processing more unstable. Moreover, the TMS results again exclude the verbal working memory effects as contained in the word list processing condition, consistent with our recent findings using either TMS4 or transcranial photobiomodulation (tPBM)26 that the causal role of LIFG in syntactic processing should be independent of verbal working memory (see also similar proposals from the neuroimaging studies; e.g., Makuuchi et al.27,28). Furthermore, the relatively low statistical power of this TMS experiment might be attributed to the the use of coordinates from the previous meta-analysis rather than those defined by hotpots detected under the contrast of “complex > simple sentence processing” in the fMRI experiment. However, how to define the candidate coordinates for TMS remains controversial24.

**3 Further exploratory analyses on the TUS data**

In Mandarin Chinese, SRC has a longer filler-gap dependency length, and is proposed to induce higher processing difficulty29–31. Thus, we further decomposed the complex sentence condition into two subconditions: SRC and ORC. If Structure type, containing SRC, ORC, and simple sentence, was included as the fixed factor, a significant main effect of Stimulation region was still identified (*F*(2, 39.10)= 3.97, *p* = 0.027), in which LIFG TUS showed longer *RT* of sentence processing than LpTL TUS (*b* = 0.020, *SE* = 0.007, *z* = 2.775, *p* = 0.017) and vertex TUS (*b* = 0.014, *SE* = 0.006, *z* = 2.298, *p* = 0.065). The main effect of Structure type was significant (*F*(2, 535.95)= 114.43, *p* < 0.001). The post-hoc tests also specified that SRC showed longer RT than ORC (*b* = 0.012, *SE* = 0.005, *z* = 2.575, *p* = 0.030) and simple sentence (*b* = 0.055, *SE* = 0.004, *z* = 13.634, *p* < 0.001), and that ORC would demand longer *RT* than simple sentence (*b* = 0.043, *SE* = 0.004, *z* = 10.701, *p* < 0.001).

As for accuracy, we also observed significant main effects of Stimulation region and Structure type (*χ²*s ≥ 15.42*, p*s < 0.001). Post-hoc analyses showed that following stimulation of the LIFG, accuracy was significantly lower compared to stimulation of either the LpTL (*b* = -0.376, *SE* = 0.098, *z* = -3.824, *p <* 0.001) or the vertex (*b* = -0.298, *SE* = 0.090, *z* = -3.330, *p* = 0.003). No significant difference was found between LpTL TUS and vertex TUS (*b* = -0.078, *SE* = 0.072, *z* = -1.080, *p* = 0.840). For Structure type, accuracy for both SRC and ORC processing was significantly lower than that for simple sentence processing (SRC processing: *b* = -0.666, *SE* = 0.118, *z* = -5.632, *p <* 0.001; ORC processing: *b* = -0.584, *SE* = 0.118, *z* = -4.930, *p <* 0.001), with no significant difference between SRC and ORC processing (*b*= -0.082, *SE* = 0.134, *z* = -0.613, *p* = 1.000). Detailed results of the LMMs (for *RT*) and GLMMs (for accuracy) are provided in Table S3 and S4.

For the processing quality indices, TUS exhibited a significant main effect on *d’* across both Structure type (*F* (1.68, 58.96) = 13.092, *p* < 0.001, *ηp*2 = 0.272) and Stimulation region (*F* (1.70, 59.57) = 6.838, *p* = 0.003, *ηp*2 = 0.163). Post-hoc comparisons further revealed that LIFG TUS led to a significant decrease in sentence-processing sensitivity, yielding lower *d’* values relative to LpTL TUS and vertex TUS (|*t|*s≥ 2.862, *p*s ≤ 0.017). The *d’* of both SRC and ORC processing were significantly lower than those of simple sentence processing (|*t|*s ≥ 3.831, *p*s ≤ 0.001). No significant interaction was observed between Stimulation region and Structure type (*F* (3.02, 105.81) = 1.490, *p* = 0.221, *ηp*2 = 0.041).

Consistent with the *d’* results, *RT** also showed significant main effects of both Structure type (*F* (1.41, 49.45) = 37.160, *p* < 0.001, *ηp*2 = 0.515) and Stimulation region (*F* (1.64, 57.28) = 9.638, *p* < 0.001, *ηp*2 = 0.216), with no significant interaction between the two factors (*F* (4, 140) = 1.584, *p* = 0.187, *ηp*2 = 0.043). Post-hoc analyses revealed that *RT** for LIFG TUS was significantly longer than that for LpTL and vertex stimulation (|*t|*s≥ 3.679, *p*s ≤ 0.001), whereas no significant difference in *RT** was observed between LpTL and vertex (*t* = -0.235, *p* = 1.000). Additionally, the *RT** for both SRC and ORC processing were significantly longer than those for simple sentence processing (|*t|*s ≥ 6.251, *p*s ≤ 0.001).

Regarding *CV*, there were no significant main effects of Structure type (*F* (1.69, 59.15) = 0.552, *p* = 0.550, *ηp*2 = 0.016) or Stimulation region (*F* (2, 70) = 1.795, *p* = 0.174, *ηp*2 = 0.049), and no significant interaction between the two factors (*F* (4, 140) = 0.421, *p* = 0.794, *ηp*2 = 0.012). The distributions of *d′*, and *RT** across sentence structures (SRC, ORC and simple sentence) are shown in Figure S3.

Whether the regions would be sensitive to the syntactic complexity effect?

Although for both *d’* and *RT**, Stimulation region and Structure type did not show significant interaction effects, as an exploration, we performed the one-repeated measures ANOVA for complex and simple sentence processing separately to test whether for all the structures, the TUS effects on LIFG, LpTL, and vertex might differ (in *d’*s or *RT**s). Intriguingly, for complex sentences, LIFG TUS induced longer *RT** and lower *d’* than LpTL TUS (|*t|*s ≥ 2.657, *p*s ≤ 0.029) and vertex TUS (|*t|*s ≤ 0.626, *p*s = 1.000). For simple sentences, the *RT** of LIFG TUS could be differentiated from that of LpTL TUS and vertex TUS (|*t|*s ≥ 3.457, *p*s ≤ 0.003). However, regarding *d’*, only LIFG TUS was marginally significantly smaller than that of vertex TUS (*t* = -2.225, *p* = 0.088). The distributions of *d′*, and *RT** across sentence structures (complex sentence and simple sentence) are shown in Figure S4. Taken together, these results demonstrated that LIFG TUS, rather than LpTL, should show a trend of sensitivity to the syntactic complexity of sentence processing.

As for the model comparison results of HDDM, for transparency, convergence diagnostics for the primary drift-rate contrasts are summarized in Table S5.

**References**

1. Chen, L. *et al.* Frontotemporal effective connectivity revealed a language-general syntactic network for Mandarin Chinese. *Journal of Neurolinguistics* **66**, 101127 (2023).

2. Klomjai, W., Katz, R. & Lackmy-Vallée, A. Basic principles of transcranial magnetic stimulation (TMS) and repetitive TMS (rTMS). *Annals of Physical and Rehabilitation Medicine* **58**, 208–213 (2015).

3. Pitcher, D., Parkin, B. & Walsh, V. Transcranial Magnetic Stimulation and the Understanding of Behavior. *Annu. Rev. Psychol.* **72**, 97–121 (2021).

4. Wu, J. *et al.* Continuous theta-burst stimulation on the left posterior inferior frontal gyrus perturbs complex syntactic processing stability in mandarin Chinese. *Neurobiology of Language* **5**, 608–627 (2024).

5. Zaccarella, E., Schell, M. & Friederici, A. D. Reviewing the functional basis of the syntactic Merge mechanism for language: A coordinate-based activation likelihood estimation meta-analysis. *Neuroscience & Biobehavioral Reviews* **80**, 646–656 (2017).

6. Gao, C. *et al.* Continuous theta-burst stimulation demonstrates language-network-specific causal effects on syntactic processing. *NeuroImage* **306**, 121014 (2025).

7. Zhang, Q. *et al.* The neural basis of semantic cognition in Mandarin Chinese: A combined fMRI and TMS study. *Human Brain Mapping* **40**, 5412–5423 (2019).

8. Rossini, P. M. *et al.* Non-invasive electrical and magnetic stimulation of the brain, spinal cord, roots and peripheral nerves: Basic principles and procedures for routine clinical and research application. An updated report from an I.F.C.N. Committee. *Clinical Neurophysiology* **126**, 1071–1107 (2015).

9. Obeso, I., Robles, N., Muñoz-Marrón, E. & Redolar-Ripoll, D. Dissociating the Role of the pre-SMA in Response Inhibition and Switching: A Combined Online and Offline TMS Approach. *Front. Hum. Neurosci.* **7**, (2013).

10. Boux, I. P. & Pulvermüller, F. Does the right temporo-parietal junction play a role in processing indirect speech acts? A transcranial magnetic stimulation study. *Neuropsychologia* **188**, 108588 (2023).

11. Wu, J. *et al.* Transcranial magnetic stimulation of the right inferior frontal gyrus impairs bilinguals’ performance in language-switching tasks. *Cognition* **254**, 105963 (2025).

12. Steel, A. *et al.* Shifts in connectivity during procedural learning after motor cortex stimulation: A combined transcranial magnetic stimulation/functional magnetic resonance imaging study. *Cortex* **74**, 134–148 (2016).

13. Jung, J. & Lambon Ralph, M. A. Enhancing vs. inhibiting semantic performance with transcranial magnetic stimulation over the anterior temporal lobe: Frequency- and task-specific effects. *NeuroImage* **234**, 117959 (2021).

14. Huang, Y.-Z., Edwards, M. J., Rounis, E., Bhatia, K. P. & Rothwell, J. C. Theta Burst Stimulation of the Human Motor Cortex. *Neuron* **45**, 201–206 (2005).

15. Baayen, R. H., Davidson, D. J. & Bates, D. M. Mixed-effects modeling with crossed random effects for subjects and items. *Journal of memory and language* **59**, 390–412 (2008).

16. Jaeger, T. F. Categorical data analysis: Away from ANOVAs (transformation or not) and towards logit mixed models. *Journal of Memory and Language* **59**, 434–446 (2008).

17. Barr, D. J. Random effects structure for testing interactions in linear mixed-effects models. *Front. Psychol.* **4**, (2013).

18. Bates, D., Mächler, M., Bolker, B. & Walker, S. Fitting linear mixed-effects models using lme4. *Journal of statistical software* **67**, 1–48 (2015).

19. Kuhnke, P., Meyer, L., Friederici, A. D. & Hartwigsen, G. Left posterior inferior frontal gyrus is causally involved in reordering during sentence processing. *NeuroImage* **148**, 254–263 (2017).

20. Meyer, L., Elsner, A., Turker, S., Kuhnke, P. & Hartwigsen, G. Perturbation of left posterior prefrontal cortex modulates top-down processing in sentence comprehension. *NeuroImage* **181**, 598–604 (2018).

21. Sakai, K. L., Noguchi, Y., Takeuchi, T. & Watanabe, E. Selective Priming of Syntactic Processing by Event-Related Transcranial Magnetic Stimulation of Broca’s Area. *Neuron* **35**, 1177–1182 (2002).

22. Uddén, J. *et al.* The inferior frontal cortex in artificial syntax processing: An rTMS study. *Brain Research* **1224**, 69–78 (2008).

23. Uddén, J., Ingvar, M., Hagoort, P. & Petersson, K. M. Broca’s region: A causal role in implicit processing of grammars with crossed non-adjacent dependencies. *Cognition* **164**, 188–198 (2017).

24. Qu, X. *et al.* Neuromodulatory effects of transcranial magnetic stimulation on language performance in healthy participants: Systematic review and meta-analysis. *Front. Hum. Neurosci.* **16**, 1027446 (2022).

25. Jeon, H.-A. & Friederici, A. D. Degree of automaticity and the prefrontal cortex. *Trends in cognitive sciences* **19**, 244–250 (2015).

26. Yang, M. *et al.* Transcranial photobiomodulation on the left inferior frontal gyrus enhances Mandarin Chinese L1 and L2 complex sentence processing performances. *Brain and Language* **256**, 105458 (2024).

27. Makuuchi, M., Bahlmann, J., Anwander, A. & Friederici, A. D. Segregating the core computational faculty of human language from working memory. *Proc. Natl. Acad. Sci. U.S.A.* **106**, 8362–8367 (2009).

28. Makuuchi, M., Grodzinsky, Y., Amunts, K., Santi, A. & Friederici, A. D. Processing noncanonical sentences in Broca’s region: reflections of movement distance and type. *Cerebral cortex* **23**, 694–702 (2013).

29. Hsiao, F. & Gibson, E. Processing relative clauses in Chinese. *Cognition* **90**, 3–27 (2003).

30. Xu, K., Duann, J.-R., Hung, D. L. & Wu, D. H. Preference for Object Relative Clauses in Chinese Sentence Comprehension: Evidence From Online Self-Paced Reading Time. *Front. Psychol.* **10**, 2210 (2019).

31. Xu, K., Wu, D. H. & Duann, J.-R. Enhanced left inferior frontal to left superior temporal effective connectivity for complex sentence comprehension: fMRI evidence from Chinese relative clause processing. *Brain and language* **200**, 104712 (2020).

**Table S1 *Results of the Linear Mixed-Effects Model for TMS RT***

|  | Fixed Effects | | | | | Random Effects | | | |
| --- | --- | --- | --- | --- | --- | --- | --- | --- | --- |
| Subject | | Item | |
| *b* | *SE* | *t* | *p* | 95% *CI* | *Variance* | *ICC* | *Variance* | *ICC* |
| Intercept | 3.070 | 0.007 | 464.17 | < 0.001 | [3.057, 3.084] | 0.001 | 0.147 | 0.000 | 0.028 |
| LpTL - LIFG | -0.003 | 0.004 | -0.62 | 0.542 | [-0.011, 0.006] | 0.000 | -- | -- | -- |
| vertex - LpTL | 0.007 | 0.005 | 1.34 | 0.189 | [-0.003, 0.017] | 0.001 | -- | -- | -- |
| COM - SP | 0.013 | 0.003 | 4.87 | < 0.001 | [0.008, 0.018] | 0.000 | -- | -- | -- |
| WL - COM | -0.055 | 0.005 | -10.19 | < 0.001 | [-0.066, -0.044] | 0.001 | -- | -- | -- |
| LpTL - LIFG : COM - SP | 0.001 | 0.005 | 0.30 | 0.762 | [-0.008, 0.010] | -- | -- | -- | -- |
| vertex - LpTL : COM - SP | -0.007 | 0.005 | -1.50 | 0.133 | [-0.016, 0.002] | -- | -- | -- | -- |
| LpTL - LIFG : WL - COM | -0.002 | 0.005 | -0.34 | 0.733 | [-0.010, 0.007] | -- | -- | -- | -- |
| vertex - LpTL : WL - COM | -0.001 | 0.005 | -0.27 | 0.785 | [-0.010, 0.008] | -- | -- | -- | -- |

*Note.* Model: lmer (*RT* ~ *Stimulation region* * *Structure type* + (1 *+ Stimulation region + Structure type* |subject) + (1 |item)). Abbreviations: COM = complex sentence; SP = simple sentence; WL = word list.

**Table S2 *Results of the Generalized Linear Mixed-Effects Model for TMS Accuracy***

|  | Fixed Effects | | | | | Random Effects | | | |
| --- | --- | --- | --- | --- | --- | --- | --- | --- | --- |
| Subject | | Item | |
| *b* | *SE* | *z* | *p* | 95% *CI* | *Variance* | *ICC* | *Variance* | *ICC* |
| Intercept | 1.919 | 0.211 | 9.08 | < 0.001 | [1.505, 2.333] | 1.279 | 0.252 | 0.508 | 0.100 |
| LpTL - LIFG | -0.060 | 0.105 | -0.57 | 0.567 | [-0.265, 0.145] | 0.008 | -- | 0.938 | -- |
| vertex - LpTL | 0.111 | 0.106 | 1.05 | 0.295 | [-0.097, 0.320] | 0.028 | -- | 0.394 | -- |
| COM - SP | -0.210 | 0.099 | -2.12 | 0.034 | [-0.405, -0.016] | 0.107 | -- | -- | -- |
| WL - COM | -0.171 | 0.094 | -1.82 | 0.069 | [-0.355, 0.013] | 0.094 | -- | -- | -- |
| LpTL - LIFG : COM - SP | 0.188 | 0.174 | 1.08 | 0.280 | [-0.153, 0.528] | -- | -- | -- | -- |
| vertex - LpTL : COM - SP | -0.079 | 0.172 | -0.46 | 0.645 | [-0.416, 0.258] | -- | -- | -- | -- |
| LpTL - LIFG : WL - COM | 0.009 | 0.170 | 0.05 | 0.960 | [-0.326, 0.343] | -- | -- | -- | -- |
| vertex - LpTL : WL - COM | 0.000 | 0.170 | 0.00 | 0.999 | [-0.333, 0.333] | -- | -- | -- | -- |

*Note.* Model: glmer (*ACC* ~ *Stimulation region* * *Structure type* + (1 *+ Stimulation region + Structure type* |subject) + (1 *+ Stimulation region* |item)).

**Table S3 *Results of the Linear Mixed-Effects Model for TUS RT***

|  | Fixed Effects | | | | | Random Effects | | | |
| --- | --- | --- | --- | --- | --- | --- | --- | --- | --- |
| Subject | | Item | |
| *b* | *SE* | *t* | *p* | 95% *CI* | *Variance* | *ICC* | *Variance* | *ICC* |
| Intercept | 3.168 | 0.008 | 406.44 | < 0.001 | [3.153, 3.184] | 0.002 | 0.127 | 0.001 | 0.068 |
| LpTL - LIFG | -0.014 | 0.006 | -2.30 | 0.027 | [-0.027, -0.002] | 0.001 | -- | -- | -- |
| vertex - LpTL | 0.007 | 0.005 | -1.05 | 0.298 | [-0.016, 0.005] | 0.001 | -- | -- | -- |
| ORC - SRC | -0.012 | 0.005 | -2.58 | 0.01 | [-0.021, -0.003] | -- | -- | -- | -- |
| SP - ORC | -0.043 | 0.004 | -10.70 | < 0.001 | [-0.051, -0.035] | -- | -- | -- | -- |
| LpTL - LIFG : ORC - SRC | -0.012 | 0.007 | -1.73 | 0.084 | [-0.025, 0.002] | -- | -- | -- | -- |
| vertex - LpTL : ORC - SRC | 0.011 | 0.007 | 1.73 | 0.083 | [-0.002, 0.024] | -- | -- | -- | -- |
| LpTL - LIFG : SP - ORC | 0.007 | 0.006 | 1.30 | 0.194 | [-0.004, 0.019] | -- | -- | -- | -- |
| vertex - LpTL : SP - ORC | -0.010 | 0.006 | -1.82 | 0.069 | [-0.021, 0.001] | -- | -- | -- | -- |

*Note.* Model: lmer (*RT* ~ *Stimulation region* * *Structure type* + (1 *+ Stimulation region* |subject) + (1 |item)). Abbreviations: SRC = subject relative clause; ORC = object relative clause; SP = simple sentence.

**Table S4 *Results of the Generalized Linear Mixed-Effects Model for TUS Accuracy***

|  | Fixed Effects | | | | | Random Effects | | | |
| --- | --- | --- | --- | --- | --- | --- | --- | --- | --- |
| Subject | | Item | |
| *b* | *SE* | *z* | *p* | 95% *CI* | *Variance* | *ICC* | *Variance* | *ICC* |
| Intercept | 2.214 | 0.125 | 17.71 | < 0.001 | [1.970, 2.460] | 0.452 | -- | 1.017 | -- |
| LpTL - LIFG | 0.298 | 0.090 | 3.33 | 0.001 | [0.123, 0.474] | 0.127 | -- | -- | -- |
| vertex - LpTL | 0.078 | 0.072 | 1.08 | 0.28 | [-0.064, 0.219] | 0.015 | -- | -- | -- |
| ORC - SRC | 0.082 | 0.134 | 0.61 | 0.54 | [-0.180, 0.344] | -- | -- | -- | -- |
| SP - ORC | 0.584 | 0.118 | 4.93 | < 0.001 | [0.351, 0.815] | -- | -- | -- | -- |
| LpTL - LIFG : ORC - SRC | -0.092 | 0.153 | -0.61 | 0.544 | [-0.391, 0.208] | -- | -- | -- | -- |
| vertex - LpTL : ORC - SRC | -0.041 | 0.159 | -0.26 | 0.796 | [-0.353, 0.269] | -- | -- | -- | -- |
| LpTL - LIFG : SP - ORC | -0.152 | 0.142 | -1.07 | 0.286 | [-0.430, 0.126] | -- | -- | -- | -- |
| vertex - LpTL : SP - ORC | 0.046 | 0.146 | 0.31 | 0.753 | [-0.240, 0.332] | -- | -- | -- | -- |

*Note.* Model: glmer (*ACC* ~ *Stimulation region* * *Structure type* + (1 *+ Stimulation region* |subject) + (1 |item)).

**Table S5. Gelman–Rubin R-hat for the primary group-level drift rate contrasts in Model v.**

| Parameter | R-hat |
| --- | --- |
| v_C(stim, Treatment(reference='vertex'))[T.lifg] | 1.03 |
| v_C(stim, Treatment(reference='vertex'))[T.lptl] | 1.04 |
| **v_C(cond, Treatment(reference='sim'))[T.com]:C(stim, Treatment(reference='vertex'))[vertex]** | 1.02 |
| **v_C(cond, Treatment(reference='sim'))[T.com]:C(stim, Treatment(reference='vertex'))[lifg]** | 1.05 |
| **v_C(cond, Treatment(reference='sim'))[T.com]:C(stim, Treatment(reference='vertex'))[lptl]** | 1.03 |

**Figure S1.** ***TMS and fMRI*** ***Experimental materials and procedures.*** (A) Illustration of syntactic manipulations across different sequences. Sequences were constructed to contrast hierarchical structures differing in dependency length (subject-relative clause, SRC; object-relative clause, ORC; the trace [t] and the filler were co-indexed by the subscript “i”, and the key dependency was marked by the curve for each complex sentence type), and embedding depth (complex, COM; simple, SP). Examples were shown with both Chinese and English literal glosses and translations. (B) fMRI experimental procedures. Each trial consisted of a jittered fixation period (0.5–2.5 s), sentence reading (4 s), and a probing question requiring response within 3s. (C) TMS experimental procedures. Participants received TMS over three sites—the left inferior frontal gyrus (LIFG), left posterior temporal lobe (LpTL), and vertex (i.e., the control site)—in a within-subjects design with sessions separated by ≥ 7 days. Consistent with the fMRI experiment, each trial comprised a jittered fixation period (0.5–2.5 s), sentence reading (4 s), and a probe question requiring a response within 3 s.


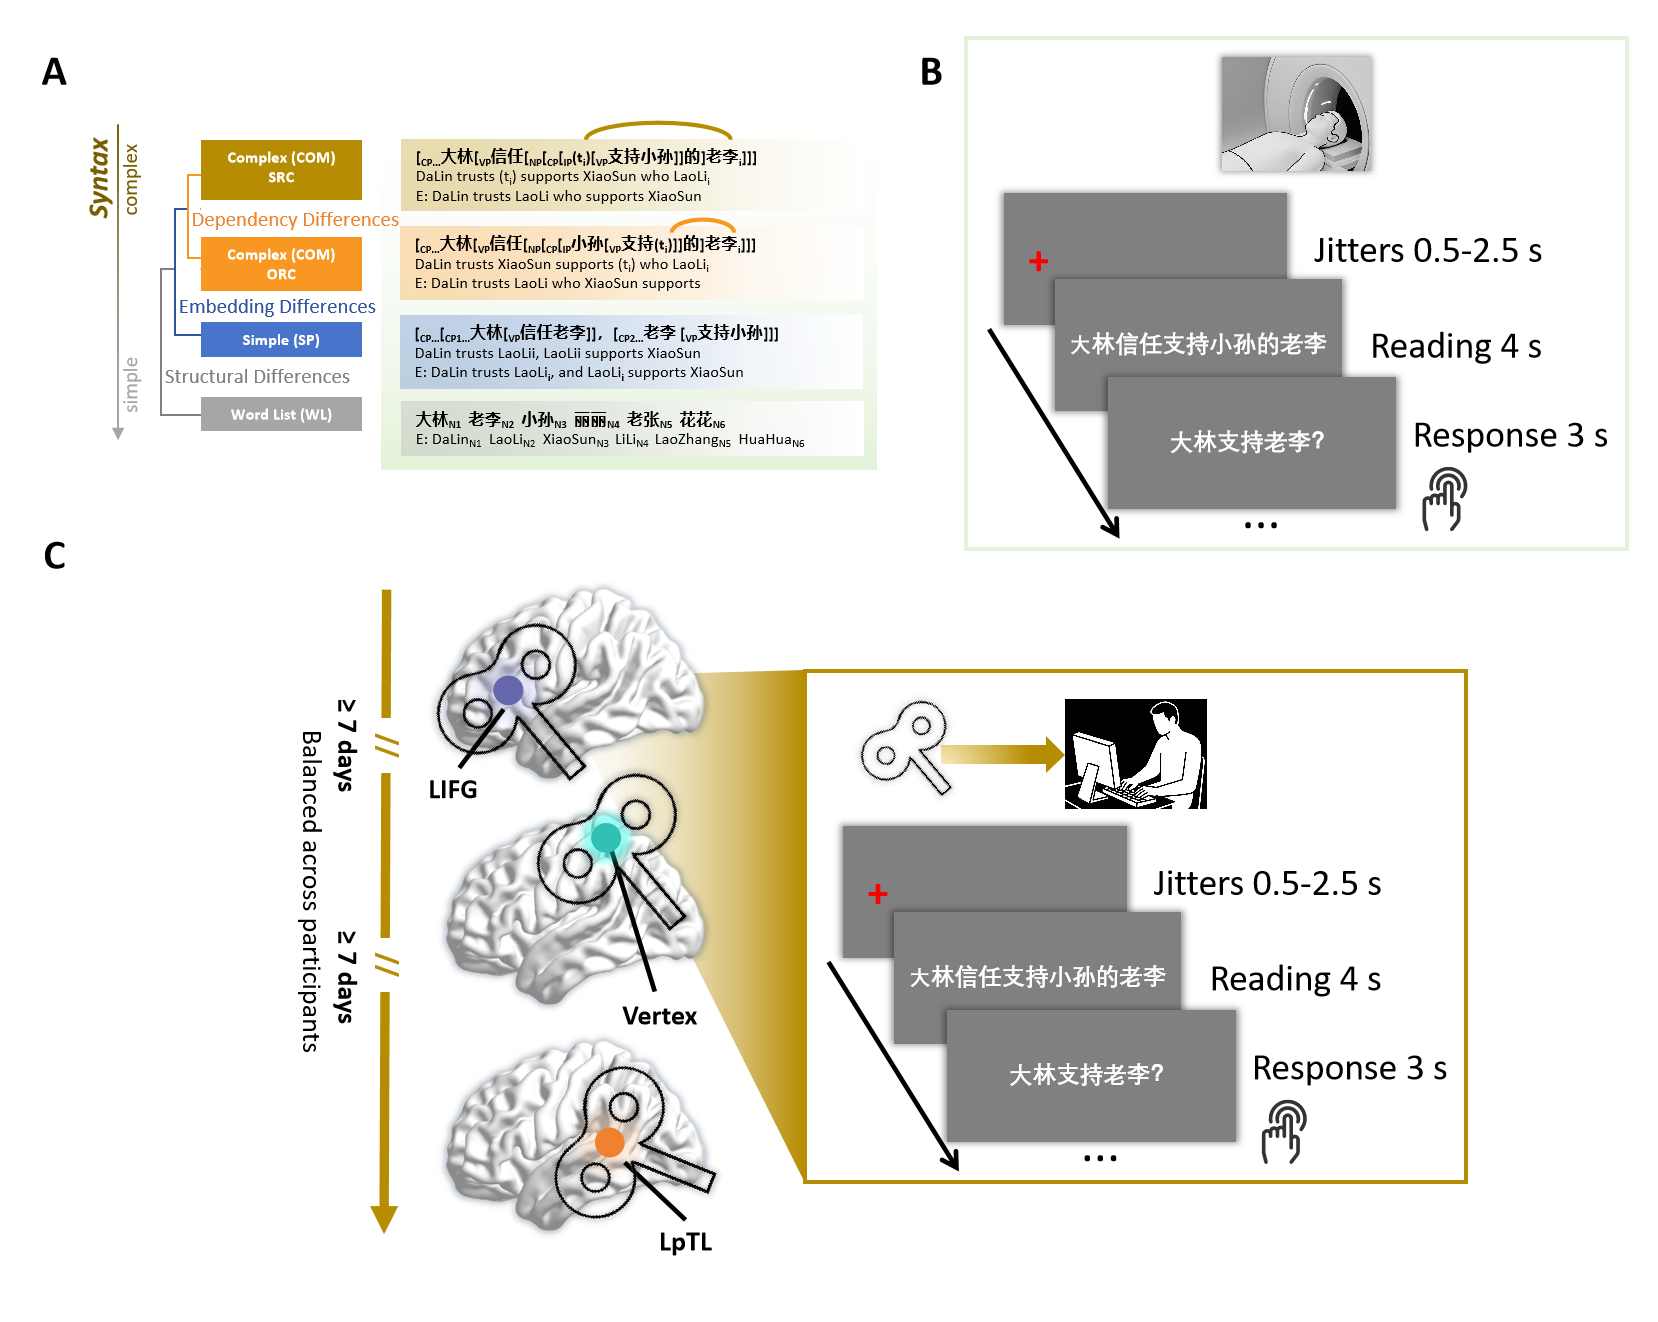


**Figure S2. *Results of the fMRI experiment for localizing key syntactic regions, and* *Distributions of significant effects of synthesized TMS indices across structural types.*** **p* < 0.05, ***p* < 0.01, ****p* < 0.001.

**
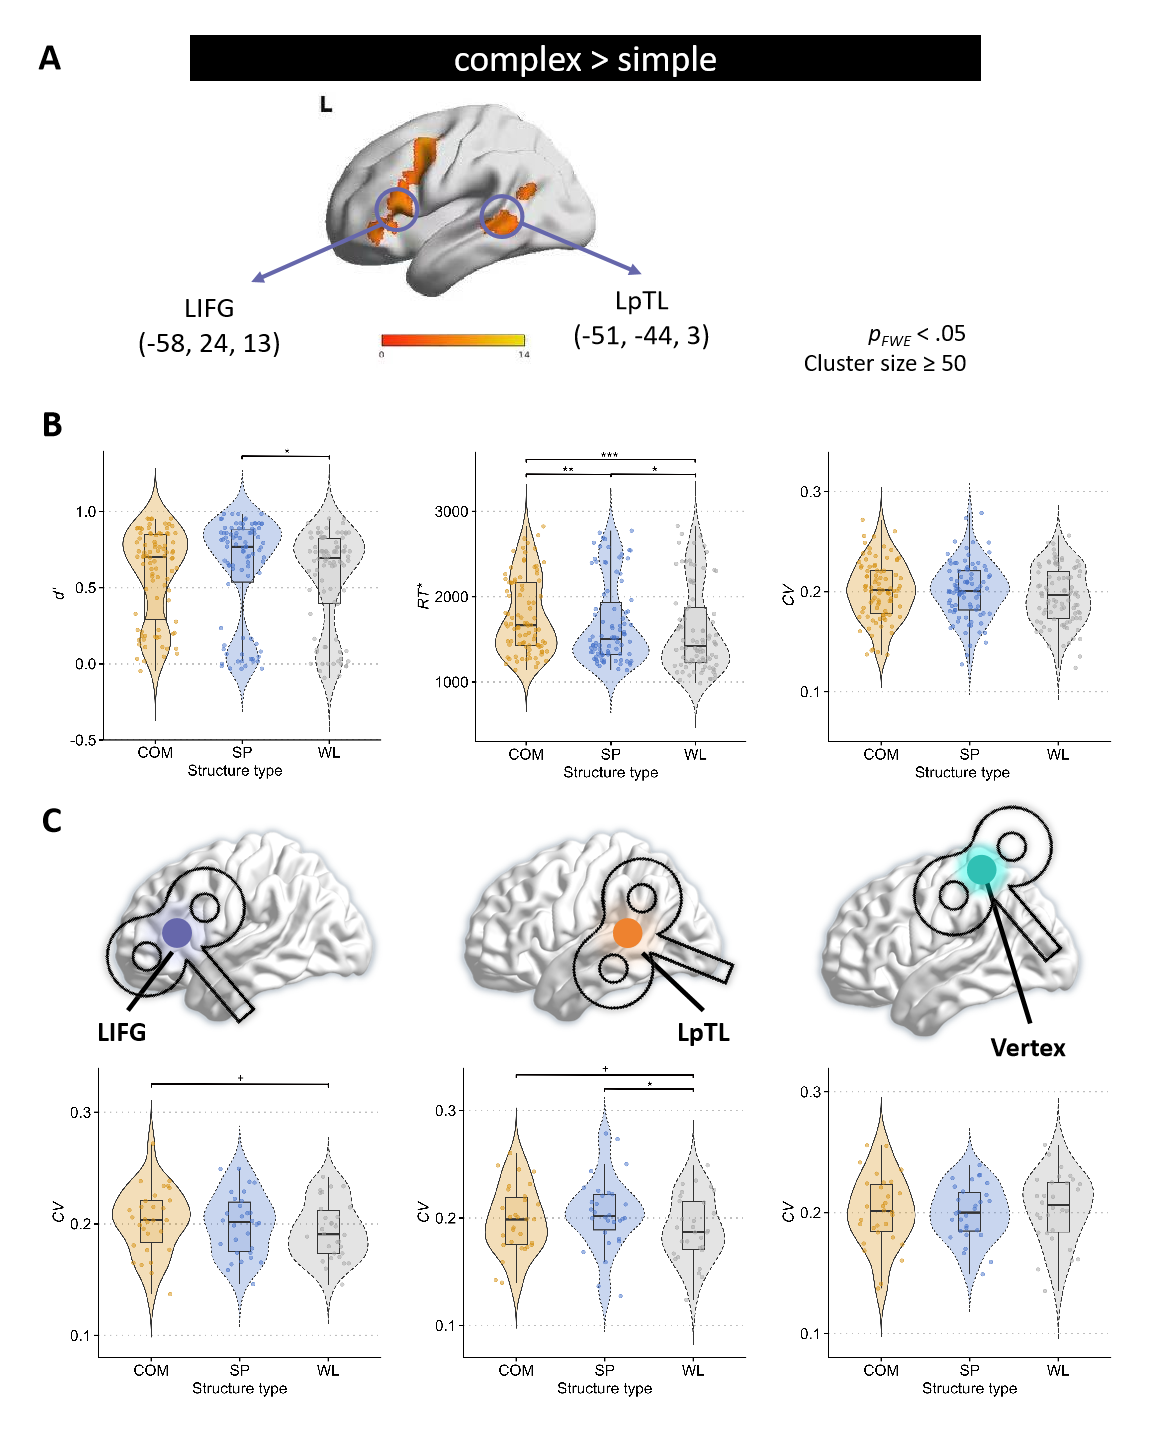
**

**Figure S3. *Distributions of significant effects of synthesized TUS indices across structural types.*** “Structure type” in Figure S3 refers to SRC, ORC, and simple sentences.

**
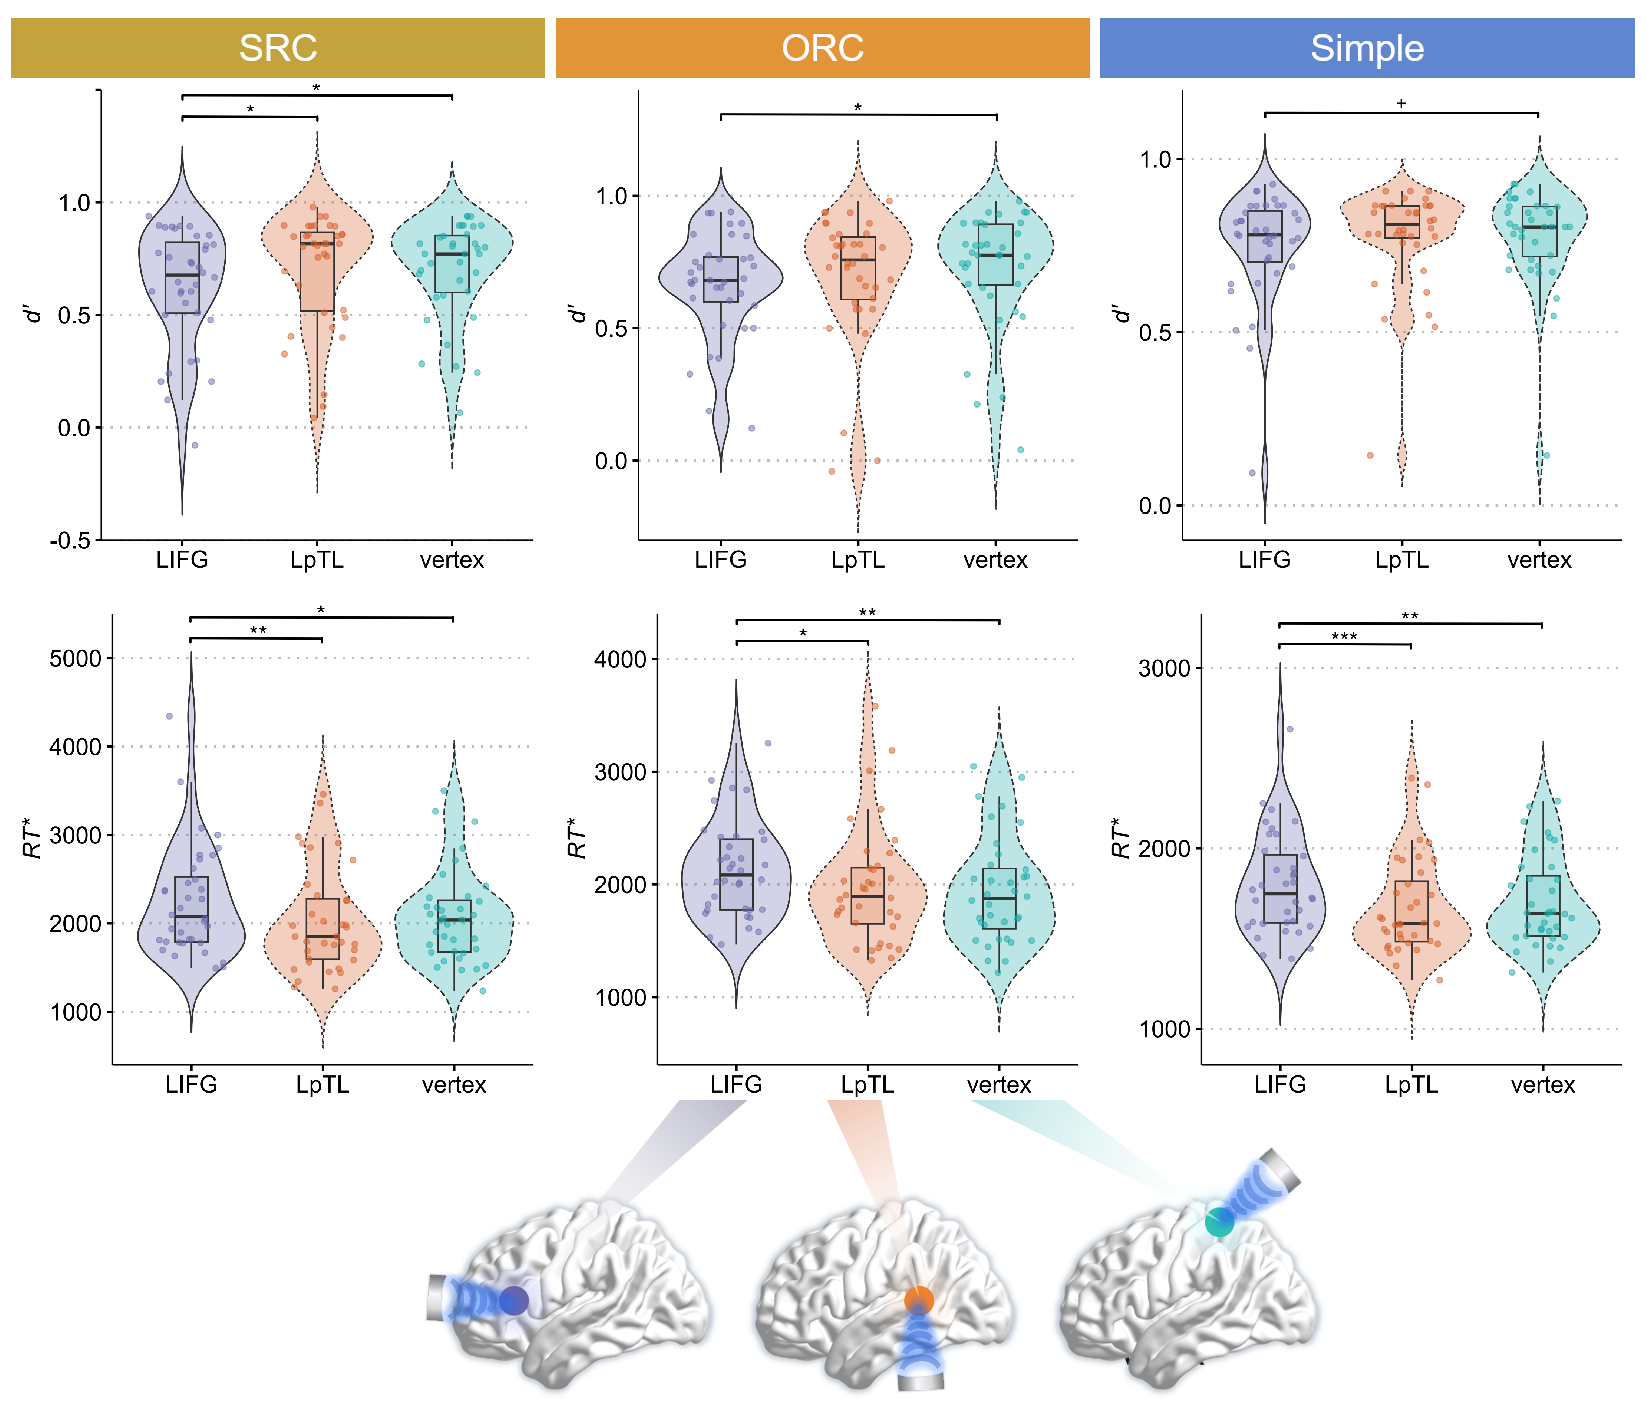
**

**Figure S4. *Distributions of significant effects of synthesized TUS indices across structural types.*** “Structure type” in Figure S4 refers to complex and simple sentences.

**
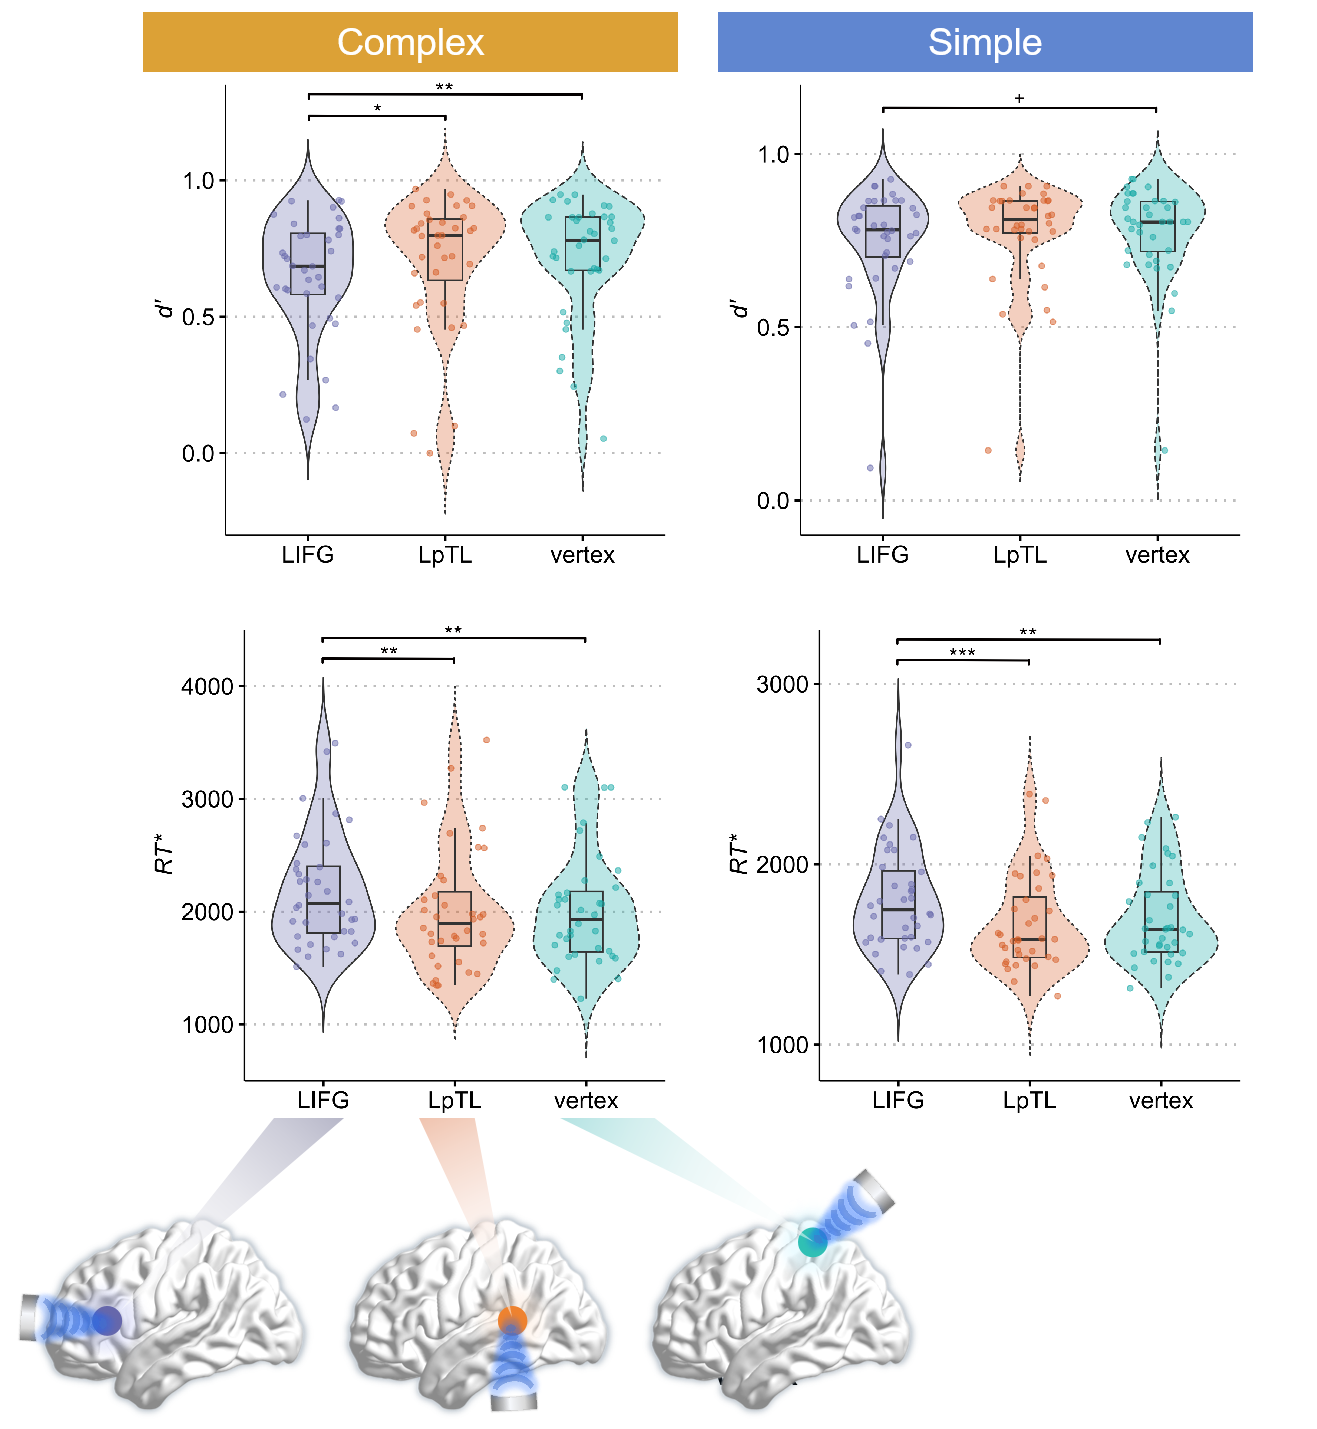
**
